# Supplementary material for: Assessing the design rules of electrides
Source: Royal Society of Chemistry journal article supplement (doi:10.1039/d4tc01468e), 2024-01-01
Supplement: d4tc01468e1.pdf [file d4tc01468e1.pdf]

## Supplementary Information for Assessing the Design Rules of Electrides

Zhikun Yao,<sup>a</sup> Yanzhen Zhao,<sup>a</sup> Wenjun Zhang<sup>a</sup> and Lee A. Burton<sup>\*b</sup>

Table S1. The full list of 51 candidates is displayed in order of the value of the Materials Project materials ID number. The chemical formula, crystal type, symmetry, electrides type and average electronegative of materials are included in the table.

| MP-ID      | Formula                                                        | Crystal System | Space group         | Symmetry number | Electrides type | Average electronegative |
|------------|----------------------------------------------------------------|----------------|---------------------|-----------------|-----------------|-------------------------|
| mp-1029640 | Ba <sub>3</sub> OsN <sub>3</sub>                               | Hexagonal      | P6 <sub>3</sub> /m  | 176             | 1D              | 1.998571429             |
| mp-1029686 | Sr <sub>3</sub> OsN <sub>3</sub>                               | Hexagonal      | P6 <sub>3</sub> /m  | 176             | 1D              | 2.024285714             |
| mp-1029741 | Sr <sub>3</sub> IrN <sub>3</sub>                               | Hexagonal      | P6 <sub>3</sub> /m  | 176             | 1D              | 2.024285714             |
| mp-1029750 | Sr <sub>3</sub> RuN <sub>3</sub>                               | Hexagonal      | P6 <sub>3</sub> /m  | 176             | 1D              | 2.024285714             |
| mp-1096    | CeS                                                            | Cubic          | Fm-3m               | 225             | 0D              | 1.85                    |
| mp-1103552 | EuAl <sub>2</sub> Se <sub>4</sub>                              | Orthorhombic   | Cccm                | 66              | 1D              | 2.088571429             |
| mp-1103889 | EuAl <sub>2</sub> S <sub>4</sub>                               | Orthorhombic   | Cccm                | 66              | 1D              | 2.105714286             |
| mp-1113208 | Cs <sub>2</sub> EuCuCl <sub>6</sub>                            | Cubic          | Fm-3m               | 225             | 0D              | 2.364                   |
| mp-1161    | LaSe                                                           | Cubic          | Fm-3m               | 225             | 0D              | 1.825                   |
| mp-1190820 | Ba <sub>2</sub> FeGe <sub>2</sub> O <sub>7</sub>               | Tetragonal     | P-4 <sub>2</sub> 1m | 113             | 0D              | 2.6425                  |
| mp-1197890 | Li <sub>2</sub> Ti <sub>2</sub> P <sub>3</sub> O <sub>12</sub> | Orthorhombic   | Pbcn                | 60              | 1D              | 2.783684211             |
| mp-1199363 | Ba <sub>3</sub> AlO <sub>4</sub>                               | Orthorhombic   | Pnma                | 62              | 0D              | 2.255                   |
| mp-1219790 | RbIr <sub>6</sub> O <sub>12</sub>                              | Tetragonal     | I4/m                | 87              | 1D              | 2.910526316             |
| mp-1226163 | La <sub>2</sub> CeTe <sub>4</sub>                              | Tetragonal     | I-42d               | 122             | 0D              | 1.674285714             |
| mp-1044323 | TiMoP <sub>3</sub> O <sub>12</sub>                             | Trigonal       | R3c                 | 161             | 1D              | 3.032352941             |
| mp-1240    | HoS                                                            | Cubic          | Fm-3m               | 225             | 0D              | 1.905                   |
| mp-1044343 | TiP <sub>3</sub> WO <sub>12</sub>                              | Trigonal       | R3c                 | 161             | 1D              | 3.044117647             |
| mp-1245    | Sr <sub>2</sub> N                                              | Trigonal       | R-3m                | 166             | 2D              | 1.646666667             |
| mp-1610    | TbS                                                            | Cubic          | Fm-3m               | 225             | 0D              | 1.84                    |
| mp-1623    | ErS                                                            | Cubic          | Fm-3m               | 225             | 0D              | 1.91                    |
| mp-17242   | Nb <sub>2</sub> P <sub>3</sub> O <sub>12</sub>                 | Trigonal       | R-3c                | 167             | 1D              | 3.002941176             |
| mp-1766    | TmS                                                            | Cubic          | Fm-3m               | 225             | 0D              | 1.915                   |
| mp-1892    | Ba <sub>2</sub> N                                              | Trigonal       | R-3m                | 166             | 2D              | 1.606666667             |
| mp-19165   | BaFeSi <sub>4</sub> O <sub>10</sub>                            | Tetragonal     | P4/ncc              | 130             | 1D              | 2.795                   |
| mp-19508   | SrCrSi <sub>4</sub> O <sub>10</sub>                            | Tetragonal     | P4/ncc              | 130             | 1D              | 2.788125                |
| mp-19518   | BaCrSi <sub>4</sub> O <sub>10</sub>                            | Tetragonal     | P4/ncc              | 130             | 1D              | 2.784375                |
| mp-22261   | InCuTe <sub>2</sub>                                            | Tetragonal     | I-42d               | 122             | 1D              | 1.97                    |
| mp-22422   | Ce <sub>3</sub> Te <sub>4</sub>                                | Cubic          | I-43d               | 220             | 1D              | 1.68                    |
| mp-2350    | LaS                                                            | Cubic          | Fm-3m               | 225             | 0D              | 1.84                    |
| mp-2470    | DyS                                                            | Cubic          | Fm-3m               | 225             | 0D              | 1.9                     |
| mp-2563    | CeSe                                                           | Cubic          | Fm-3m               | 225             | 0D              | 1.835                   |
| mp-2686    | Ca <sub>2</sub> N                                              | Trigonal       | R-3m                | 166             | 2D              | 1.68                    |
| mp-27334   | Tl <sub>3</sub> FeCl <sub>5</sub>                              | Tetragonal     | I4/mcm              | 140             | 0D              | 2.498888889             |
| mp-37312   | NaLa <sub>8</sub> Se <sub>12</sub>                             | Tetragonal     | I-42d               | 122             | 0D              | 1.92047619              |

<sup>a</sup> International Centre for Quantum and Molecular Structures, Department of Physics, Shanghai University, Shanghai 200444, China.

<sup>b</sup> Department of Materials Science and Engineering, The Ilby and Aladar Fleischman Faculty of Engineering, Tel Aviv University, Ramat Aviv, Tel Aviv 6997801, Israel

|                  |                                                                  |              |          |     |    |             |
|------------------|------------------------------------------------------------------|--------------|----------|-----|----|-------------|
| <b>mp-3779</b>   | CrSiTe <sub>3</sub>                                              | Trigonal     | R-3      | 148 | 2D | 1.972       |
| <b>mp-3787</b>   | RbFe <sub>2</sub> S <sub>3</sub>                                 | Orthorhombic | Cmcm     | 63  | 0D | 2.036666667 |
| <b>mp-510262</b> | Cs <sub>3</sub> O                                                | Hexagonal    | P6_3/mcm | 193 | 1D | 1.4525      |
| <b>mp-510402</b> | GdS                                                              | Cubic        | Fm-3m    | 225 | 0D | 1.89        |
| <b>mp-541318</b> | CsTi <sub>3</sub> Si <sub>2</sub> P <sub>6</sub> O <sub>25</sub> | Trigonal     | P-31c    | 163 | 0D | 2.928378378 |
| <b>mp-541449</b> | CrGeTe <sub>3</sub>                                              | Trigonal     | R-3      | 148 | 2D | 1.994       |
| <b>mp-542475</b> | CsFe <sub>2</sub> S <sub>3</sub>                                 | Orthorhombic | Cmcm     | 63  | 1D | 2.031666667 |
| <b>mp-569673</b> | PrI <sub>2</sub>                                                 | Cubic        | F-43m    | 216 | 0D | 2.15        |
| <b>mp-573523</b> | Sr <sub>8</sub> Fe <sub>3</sub> N <sub>8</sub>                   | Monoclinic   | C2/m     | 12  | 1D | 1.968947368 |
| <b>mp-574283</b> | GdTe                                                             | Cubic        | Fm-3m    | 225 | 0D | 1.65        |
| <b>mp-656</b>    | LuS                                                              | Cubic        | Fm-3m    | 225 | 0D | 1.925       |
| <b>mp-662563</b> | CsFe <sub>2</sub> Se <sub>3</sub>                                | Orthorhombic | Cmcm     | 63  | 1D | 2.016666667 |
| <b>mp-672252</b> | LiEuPS <sub>4</sub>                                              | Tetragonal   | I4_1/acd | 142 | 0D | 2.098571429 |
| <b>mp-675037</b> | Sm <sub>2</sub> EuS <sub>4</sub>                                 | Tetragonal   | I-42d    | 122 | 1D | 1.98        |
| <b>mp-721592</b> | Ca <sub>6</sub> Al <sub>7</sub> O <sub>16</sub>                  | Cubic        | I-43d    | 220 | 0D | 2.4713      |
| <b>mp-867221</b> | Ce <sub>3</sub> Ta <sub>2</sub> N <sub>6</sub>                   | Tetragonal   | I4/mmm   | 139 | 1D | 2.236363636 |
| <b>mp-867290</b> | TbTe                                                             | Hexagonal    | P-6m2    | 187 | 0D | 1.6         |

Table S2. The statistic on the composed elements of these 51 candidates.

| Element    | Cation     |              |                    |                  |       |      |      | Anion |      |         |
|------------|------------|--------------|--------------------|------------------|-------|------|------|-------|------|---------|
|            | Lanthanide | Alkali metal | Alkali earth metal | Transition metal | III A | IV A | P    | N     | VI A | Halogen |
| Count      | 25         | 10           | 15                 | 25               | 6     | 7    | 6    | 9     | 38   | 3       |
| Percentage | 26.6%      | 10.6%        | 16%                | 26.6%            | 6.4%  | 7.4% | 6.4% | 18%   | 76%  | 6%      |



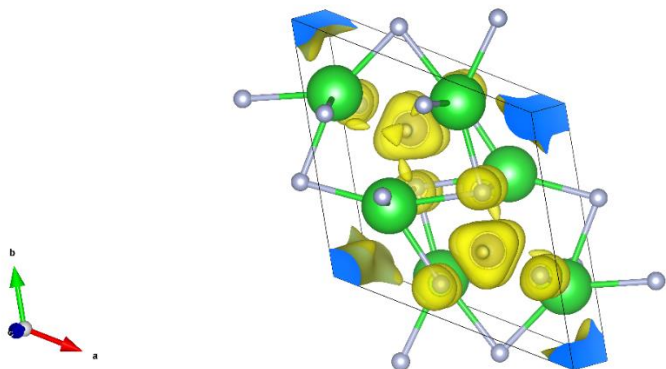

Figure S1:  $\text{Ba}_3\text{OsN}_3$ (mp-1029640). Symmetry: Hexagonal;  $P6_3/m$  (number 176).

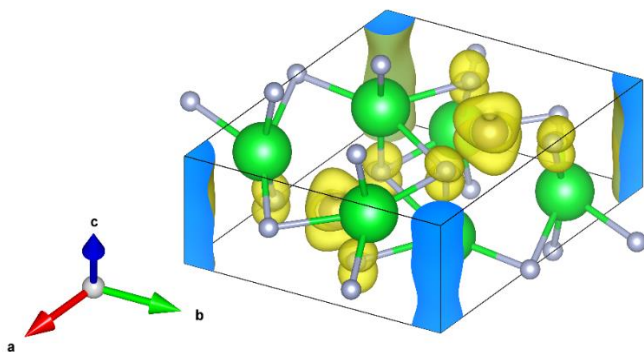

Figure S2:  $\text{Sr}_3\text{OSN}_3$ (mp-1029686). Symmetry: Hexagonal;  $P6_3/m$  (number 176).

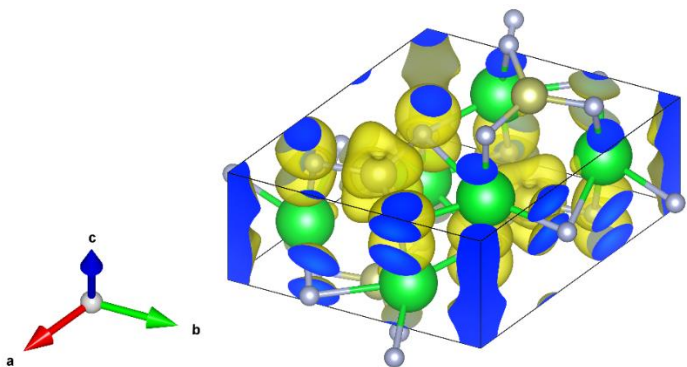

Figure S3:  $\text{Sr}_3\text{IrN}_3$ (mp-1029741). Symmetry: Hexagonal;  $P6_3/m$  (number 176).

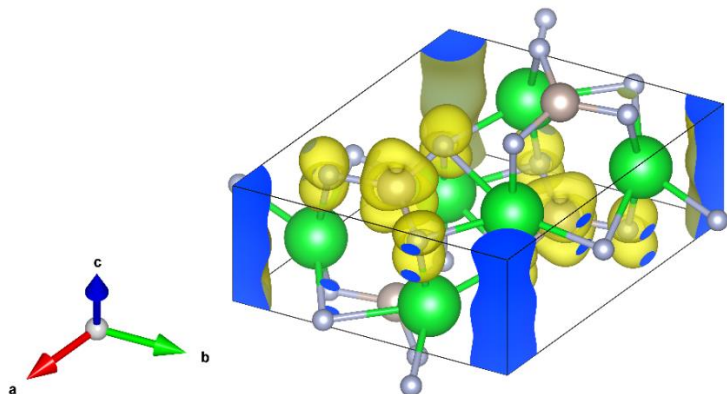

Figure S4:  $\text{Sr}_3\text{RuN}_3$ (mp-1029750). Symmetry: Hexagonal;  $P6_3/m$  (number 176).

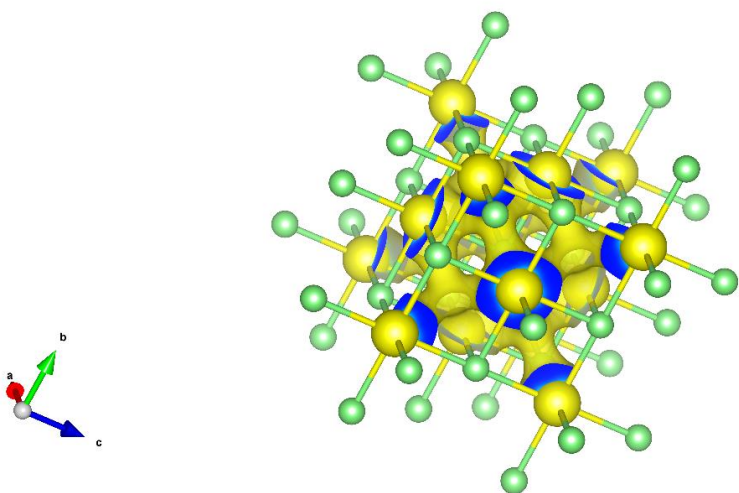

Figure S5: CeS(mp-1096), LaSe(mp-1161), HoS(mp-1240), TbS(mp-1610), ErS(mp-1623), TmS(mp-1766), LaS(mp-2350), DyS(mp-2470), CeSe(mp-2563), GdS(mp-510402), GdTe(mp-574283) and LuS(mp-656). Symmetry: Cubic; Fm-3m (number 225).

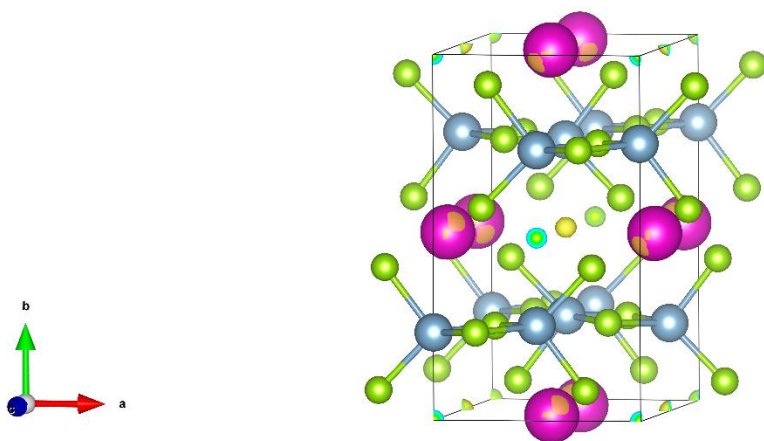

Figure S6:  $\text{EuAl}_2\text{Se}_4$ (mp-1103552). Symmetry: Orthorhombic; Cccm (number 66).

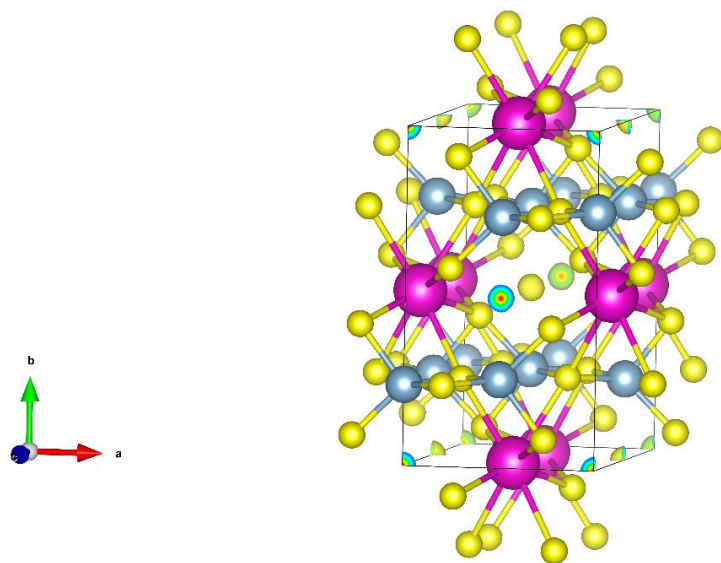

Figure S7:  $\text{EuAl}_2\text{S}_4$ (mp-1103889). Symmetry: Orthorhombic; Cccm (number 66).

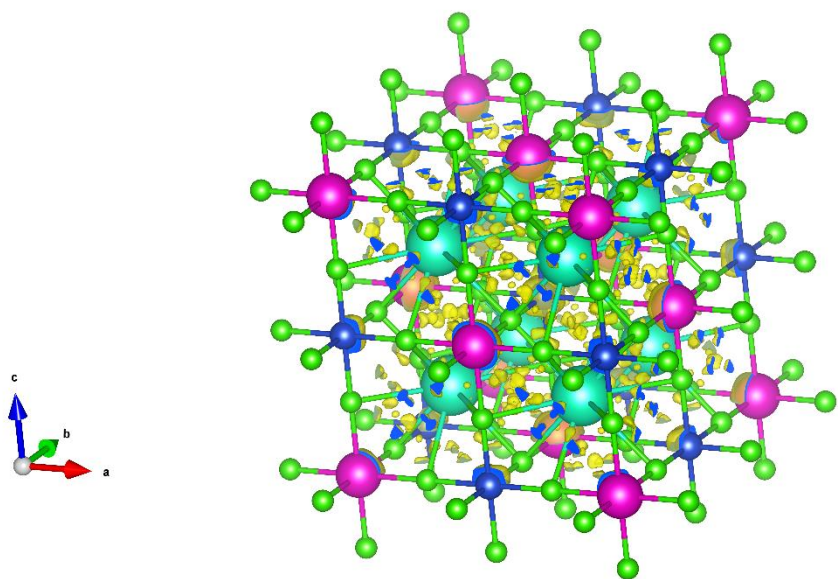

Figure S8:  $\text{Cs}_2\text{EuCuCl}_6$ (mp-1113208). Symmetry: Cubic; Fm-3m (number 225)..

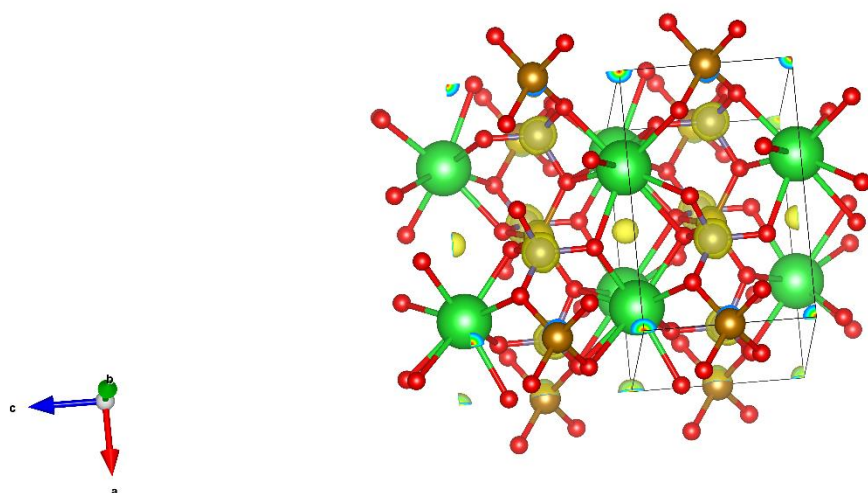

Figure S9:  $\text{Ba}_2\text{FeGe}_2\text{O}_7$ (mp-1190820). Symmetry: Tetragonal; P-42\_1m (number 113).

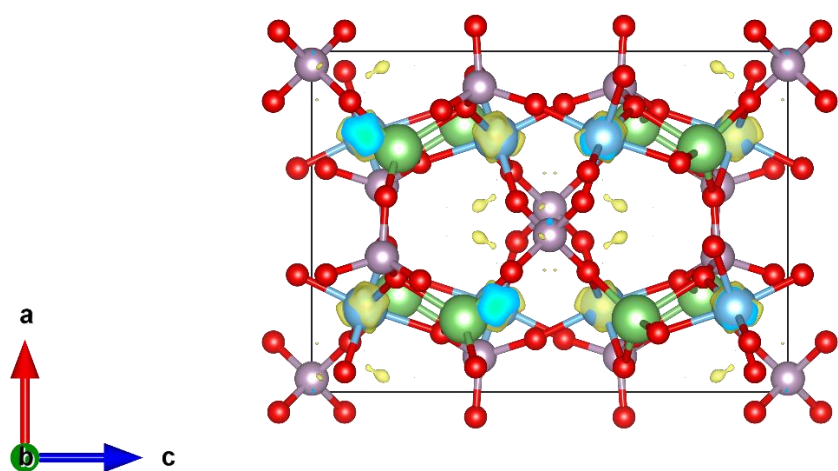

Figure S10:  $\text{Li}_2\text{Ti}_2\text{P}_3\text{O}_{12}$ (mp-1197890). Symmetry: Orthorhombic; Pbcn (number 60).

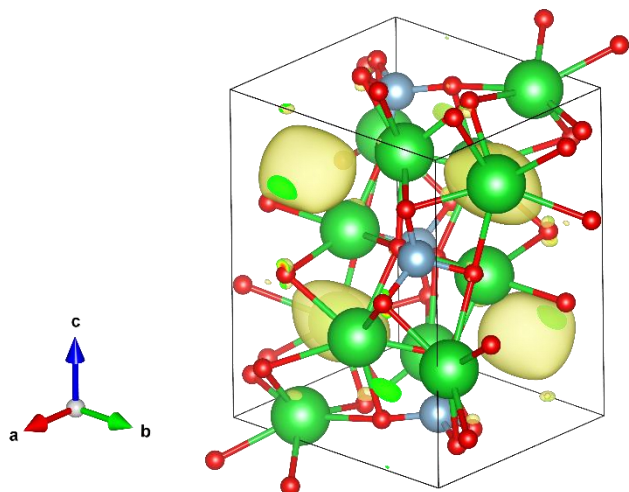

Figure S11: Ba<sub>3</sub>AlO<sub>4</sub>(mp-1199363). Symmetry: Orthorhombic; Pnma (number 62).

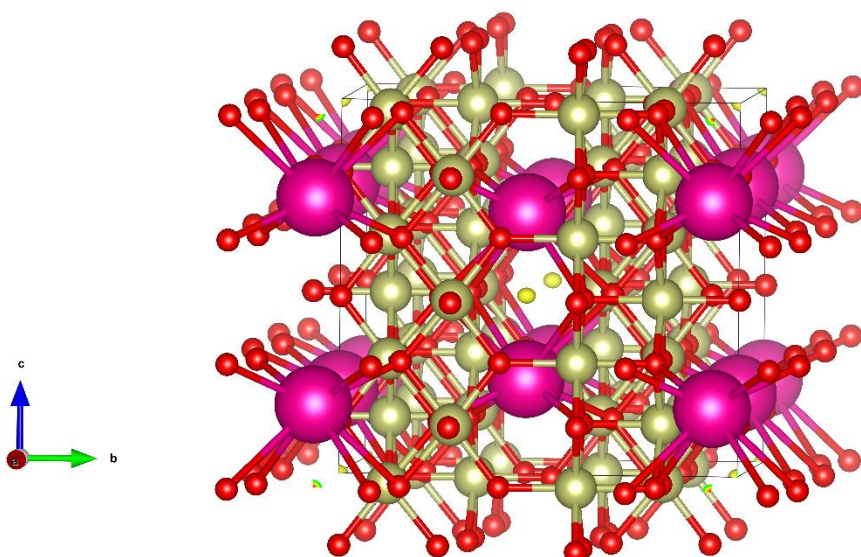

Figure S12: RbIr<sub>6</sub>O<sub>12</sub>(mp-1219790). Symmetry: Tetragonal; I4/m (number 87).

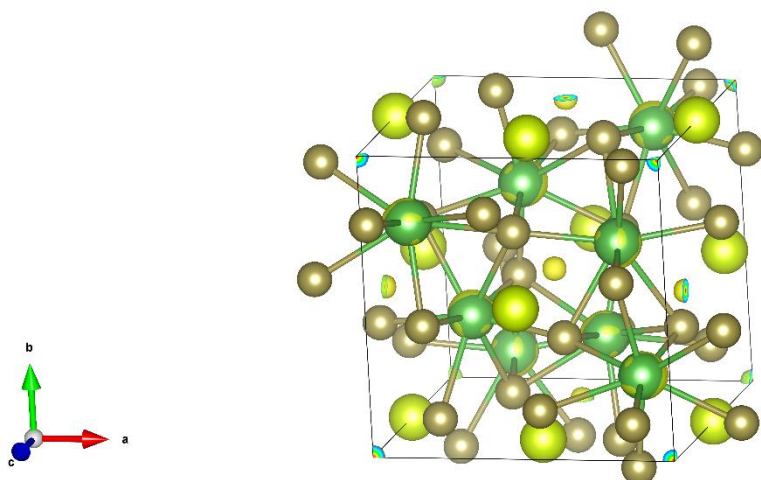

Figure S13: La<sub>2</sub>CeTe<sub>4</sub>(mp-1226163). Symmetry: Tetragonal; I-42d (number 122).

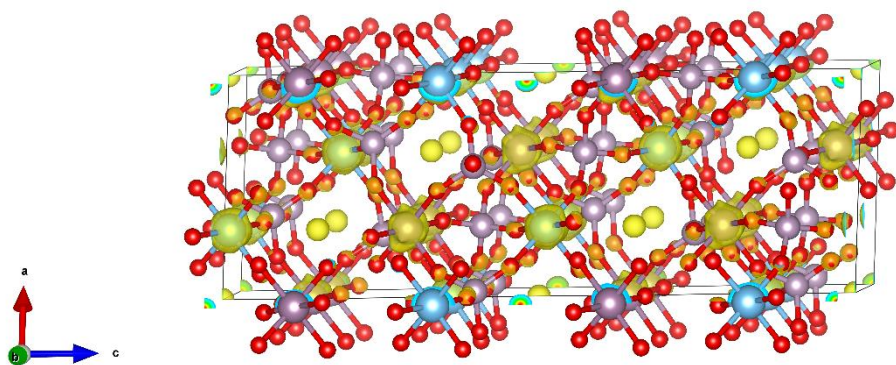

Figure S14: TiMoP<sub>3</sub>O<sub>12</sub>(mp-1044323). Symmetry: Trigonal; R3c (number 161).

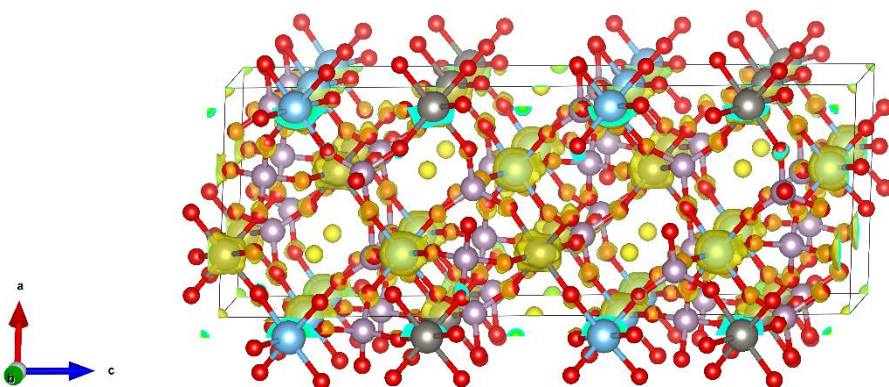

Figure S15: TiP<sub>3</sub>WO<sub>12</sub>(mp-1044343). Symmetry: Trigonal; R3c (number 161).

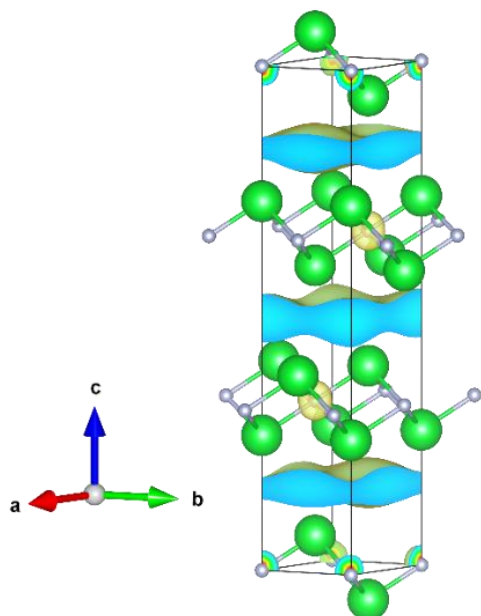

Figure S16: Sr<sub>2</sub>N(mp-1245). Symmetry: Trigonal; R-3m (number 166).



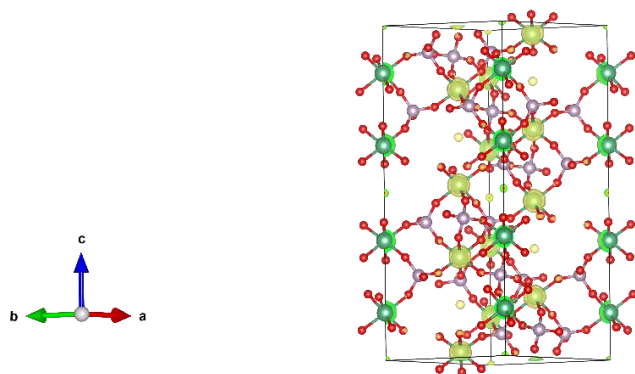

Figure S17: Nb<sub>2</sub>P<sub>3</sub>O<sub>12</sub>(mp-17242). Symmetry: Trigonal; R-3c (number 167).

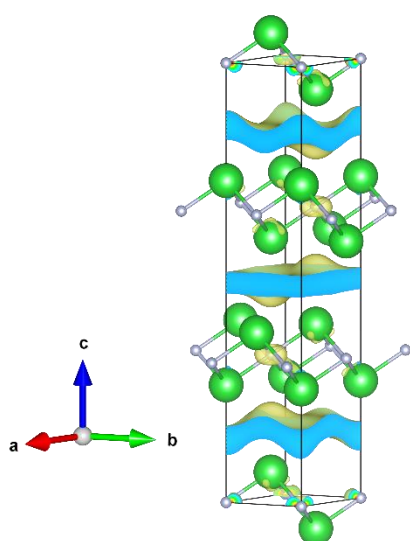

Figure S18: Ba<sub>2</sub>N(mp-1892). Symmetry: Trigonal; R-3m (number 166).

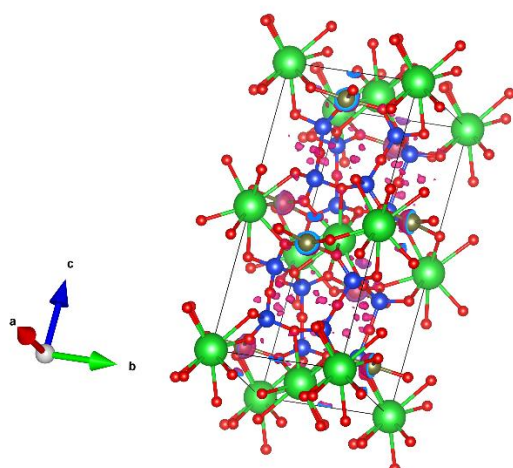

Figure S19: BaFeSi<sub>4</sub>O<sub>10</sub>(mp-19165). Symmetry: Tetragonal; P4/ncc (number 130).

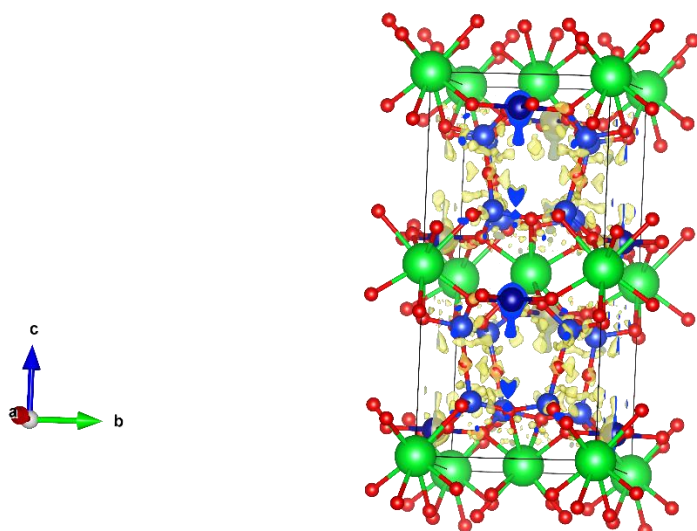

Figure S20:  $\text{SrCrSi}_4\text{O}_{10}$ (mp-19508). Symmetry: Tetragonal;  $P4/ncc$  (number 130).

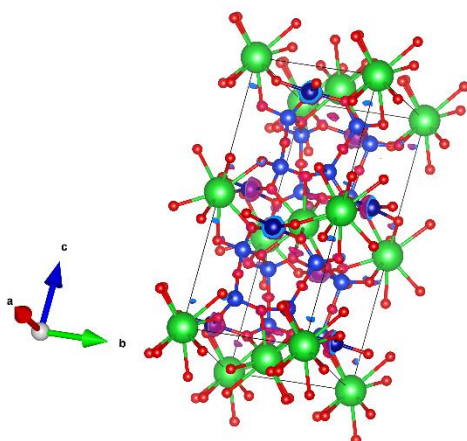

Figure S21:  $\text{BaCrSi}_4\text{O}_{10}$ (mp-19518). Symmetry: Tetragonal;  $P4/ncc$  (number 130).

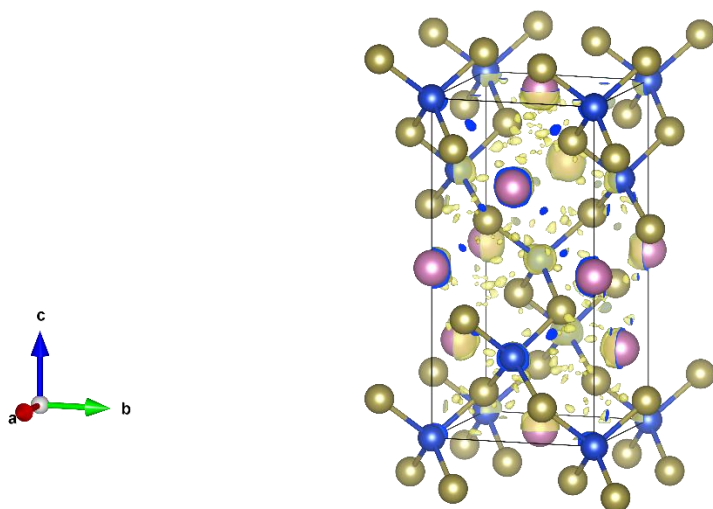

Figure S22:  $\text{InCuTe}_2$ (mp-22261). Symmetry: Tetragonal;  $I-42d$  (number 122).

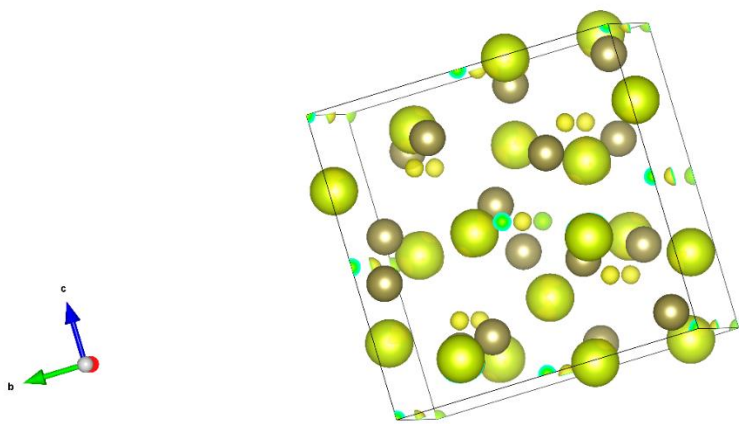

Figure S23: Ce<sub>3</sub>Te<sub>4</sub>(mp-22422). Symmetry: Cubic; I-43d (number 130).

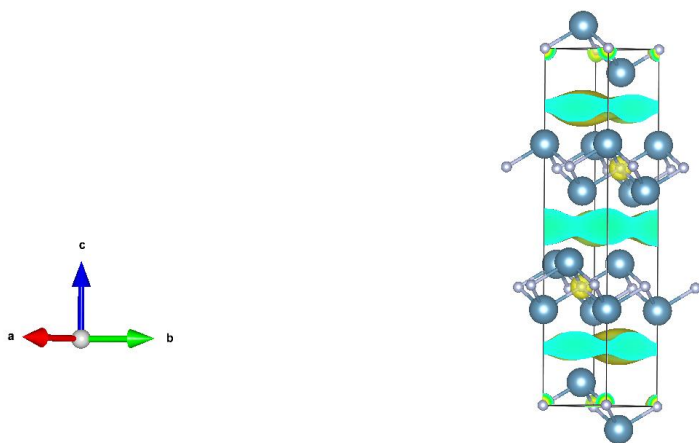

Figure S24: Ca<sub>2</sub>N(mp-2686). Symmetry: Trigonal; R-3m (number 166).

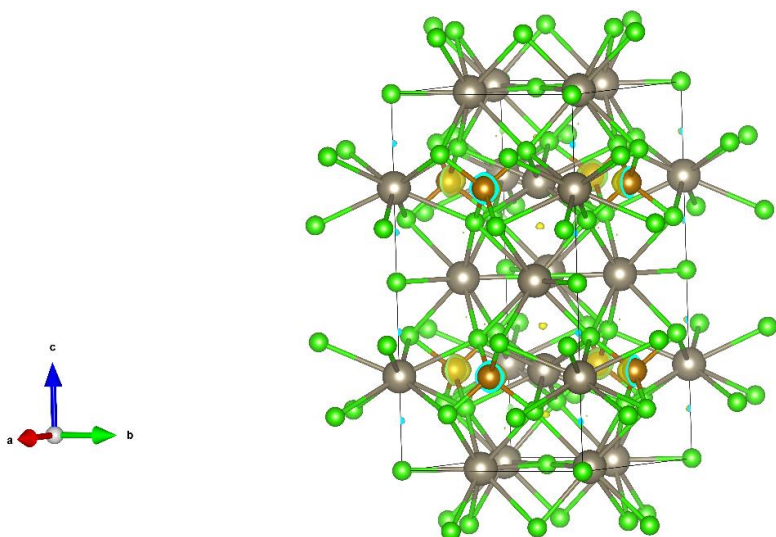

Figure S25: Tl<sub>3</sub>FeCl<sub>5</sub>(mp-27334). Symmetry: Tetragonal; I4/mcm (number 140).

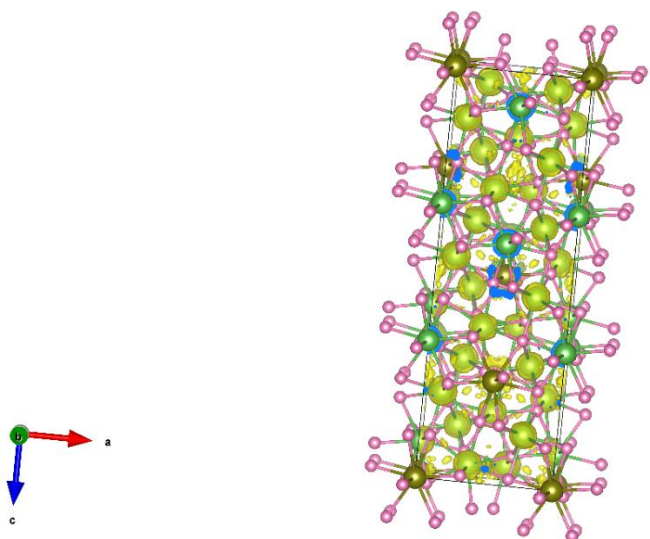

Figure S26: NaLa<sub>8</sub>Se<sub>12</sub>(mp-37312). Symmetry: Tetragonal; I-42d (number 122).

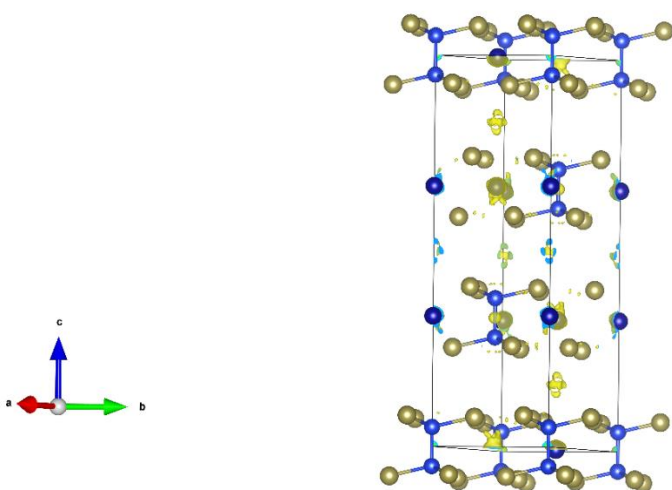

Figure S27: CrSiTe<sub>3</sub>(mp-3779). Symmetry: Trigonal; R-3 (number 148).

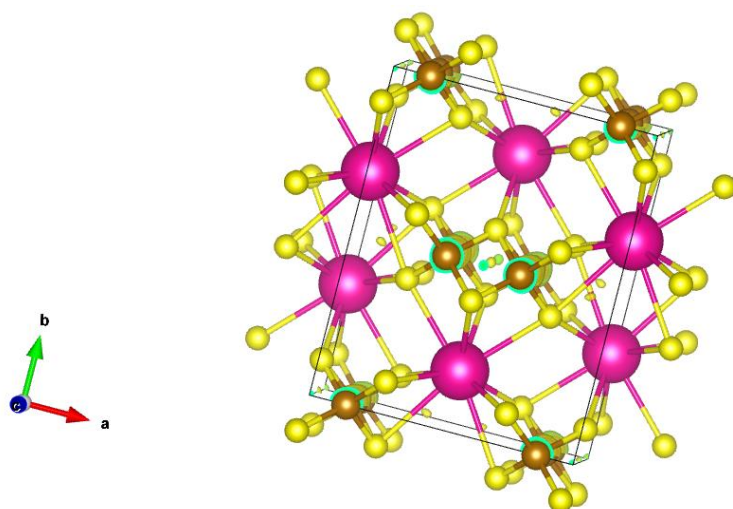

Figure S28: RbFe<sub>2</sub>S<sub>3</sub>(mp-3787). Symmetry: Orthorhombic; Cmcm (number 63)

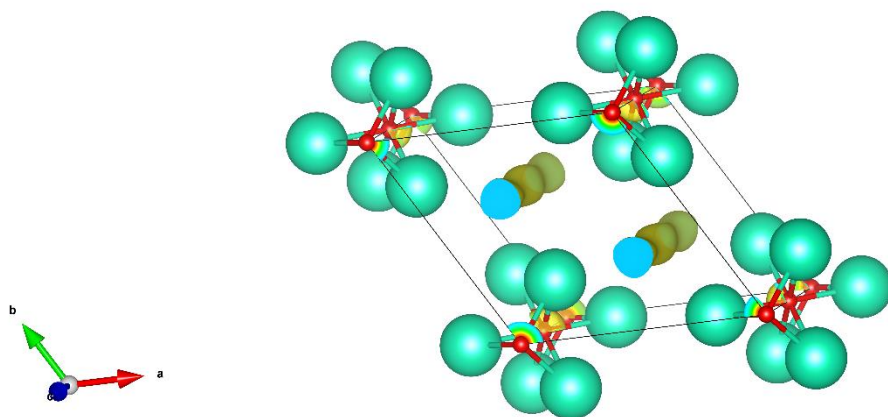

Figure S29: Cs<sub>3</sub>O(mp-510262). Symmetry: Hexagonal; P6<sub>3</sub>/mcm (number 193)

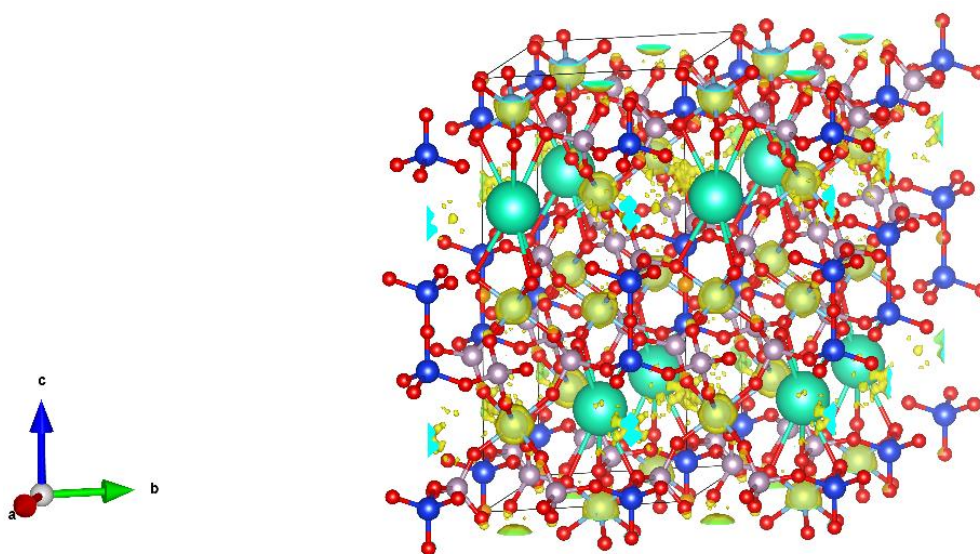

Figure S30: CsTi<sub>3</sub>Si<sub>2</sub>P<sub>6</sub>O<sub>25</sub>(mp-541318). Symmetry: Trigonal; P-31c (number 163)

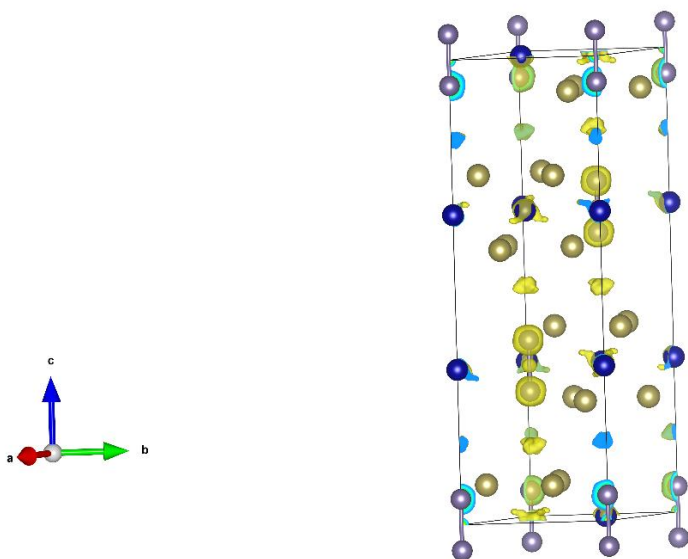

Figure S31: CrGeTe<sub>3</sub>(mp-541449). Symmetry: Trigonal; R-3 (number 148)

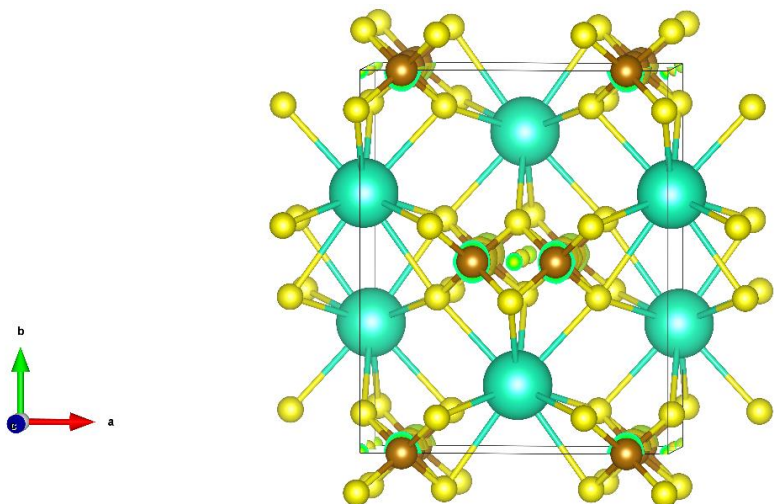

Figure S32: CsFe<sub>2</sub>S<sub>3</sub>(mp-542475). Symmetry: Orthorhombic; Cmc<sub>2</sub>m (number 63).

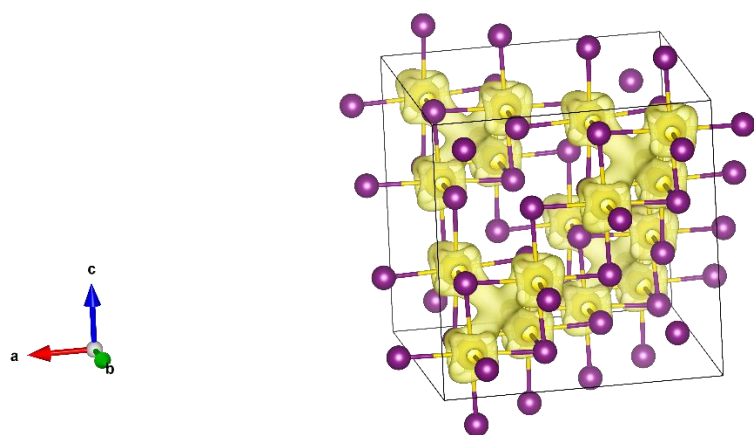

Figure S33: PrI<sub>2</sub>(mp-569673). Symmetry: Cubic; Fm $\bar{3}$ m (number 216)

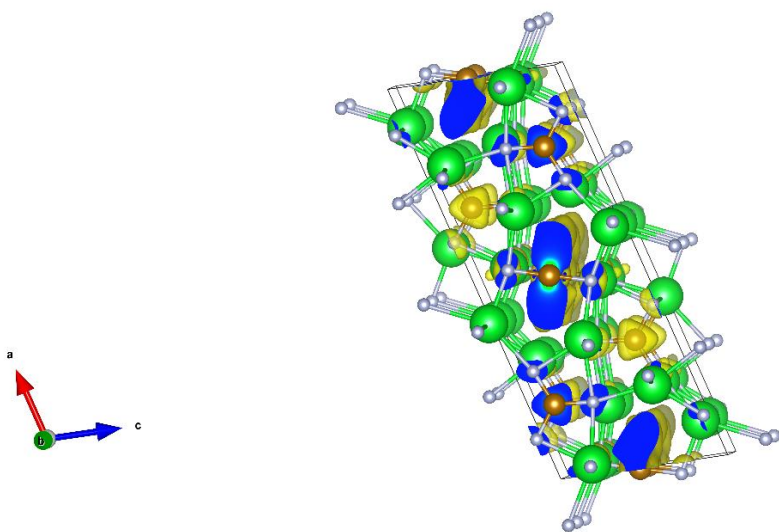

Figure S34: Sr<sub>8</sub>Fe<sub>3</sub>N<sub>8</sub>(mp-573523). Symmetry: Monoclinic; C2/m (number 12).

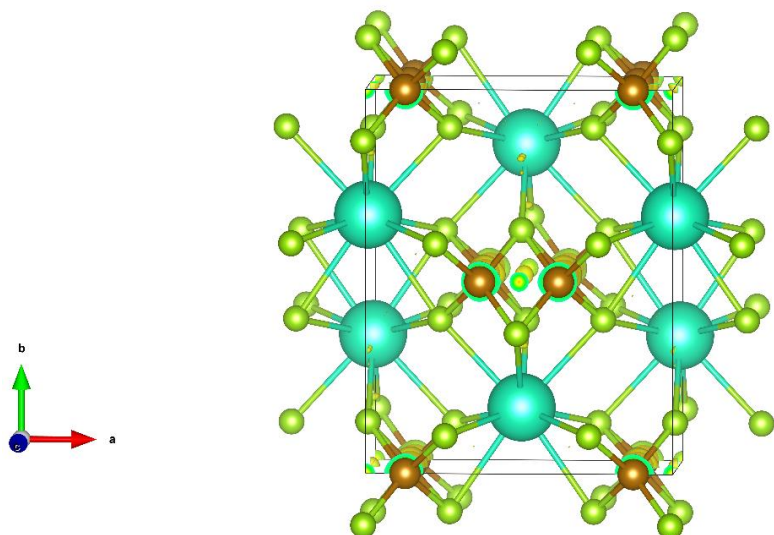

Figure S35: CsFe<sub>2</sub>Se<sub>3</sub>(mp-662563). Symmetry: Orthorhombic; Cmcm (number 63).

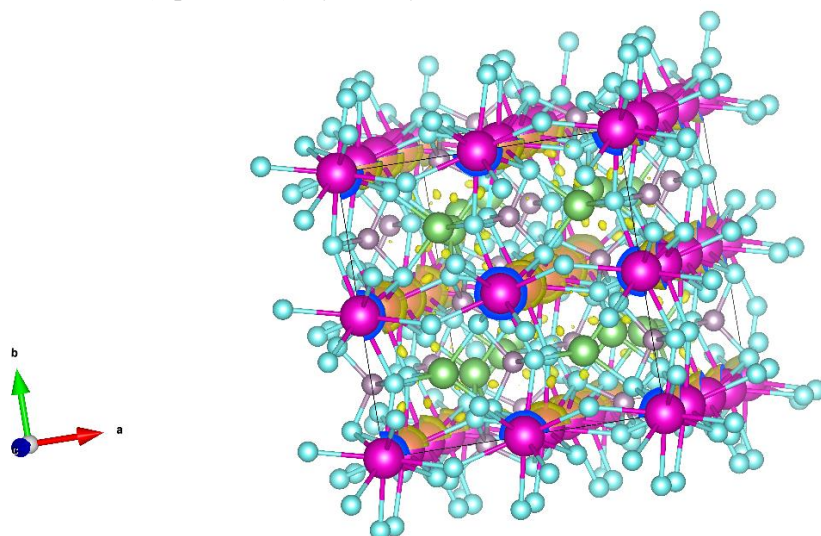

Figure S36: LiEuPS<sub>4</sub>(mp-672252). Symmetry: Tetragonal; I4<sub>1</sub>/acd (number 142).

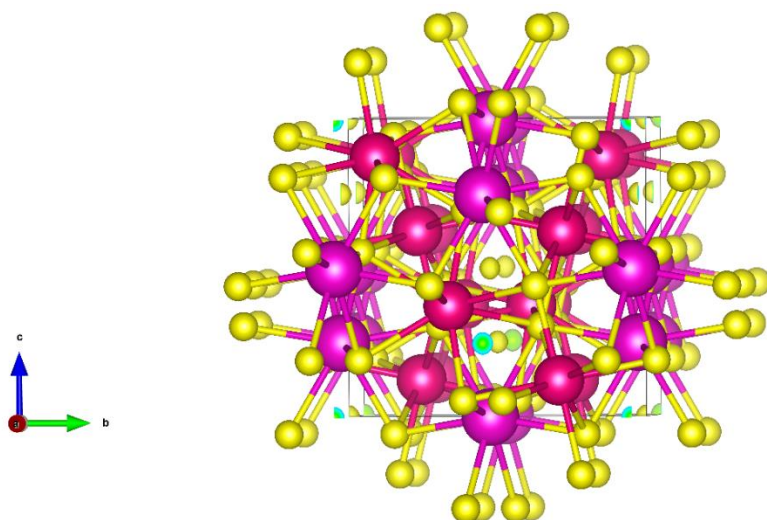

Figure S37: Sm<sub>2</sub>EuS<sub>4</sub>(mp-675037). Symmetry: Tetragonal; I-42d (number 122).

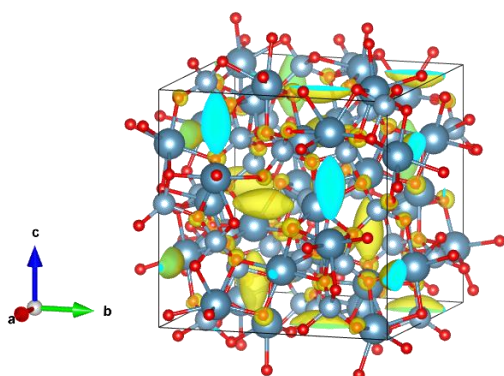

Figure S38: Ca<sub>6</sub>Al<sub>7</sub>O<sub>16</sub>(mp-721592). Symmetry: Cubic; I-43d (number 220).

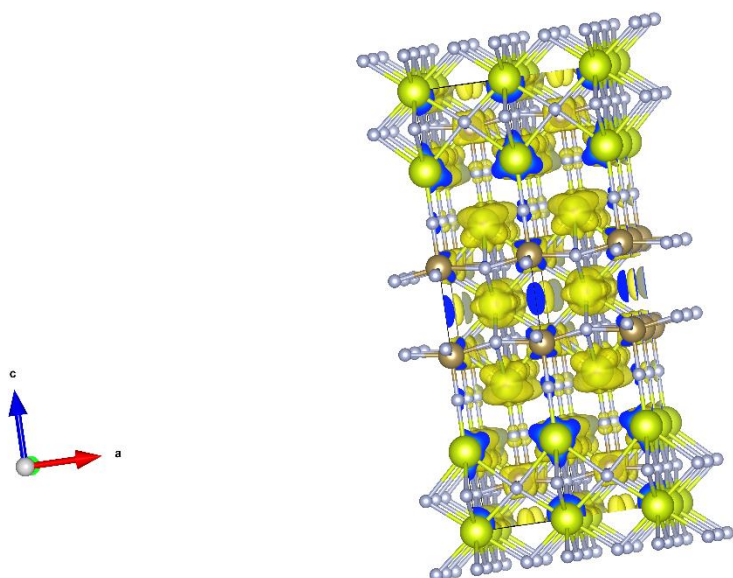

Figure S39: Ce<sub>3</sub>Ta<sub>2</sub>N<sub>6</sub>(mp-867221). Symmetry: Tetragonal; I4/mmm (number 139).

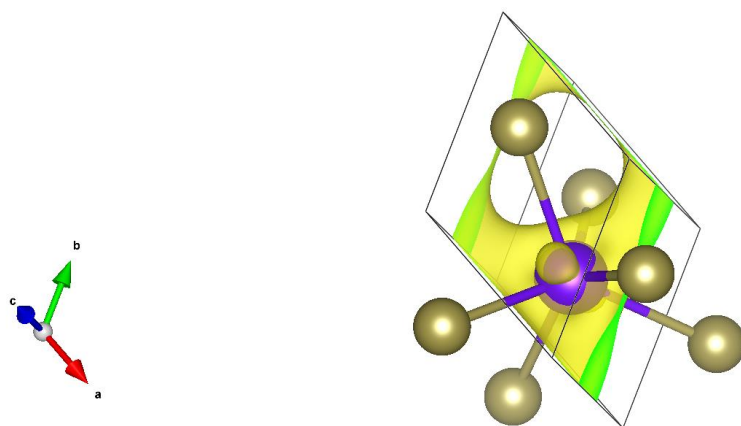

Figure S40: TbTe(mp-867290). Symmetry: Hexagonal; P-6m2 (number 187).
